# Supplementary material for: PRCTC: a machine learning model for prediction of response to corticosteroid therapy in COVID-19 patients
Source: Aging (Albany NY). 2022 Jan 12;14(1):54–72. doi: 10.18632/aging.203819 (PMC8791209; doi:10.18632/aging.203819)
Supplement: Supplementary Figures [file aging-14-203819-s001.pdf]

## SUPPLEMENTARY FIGURES

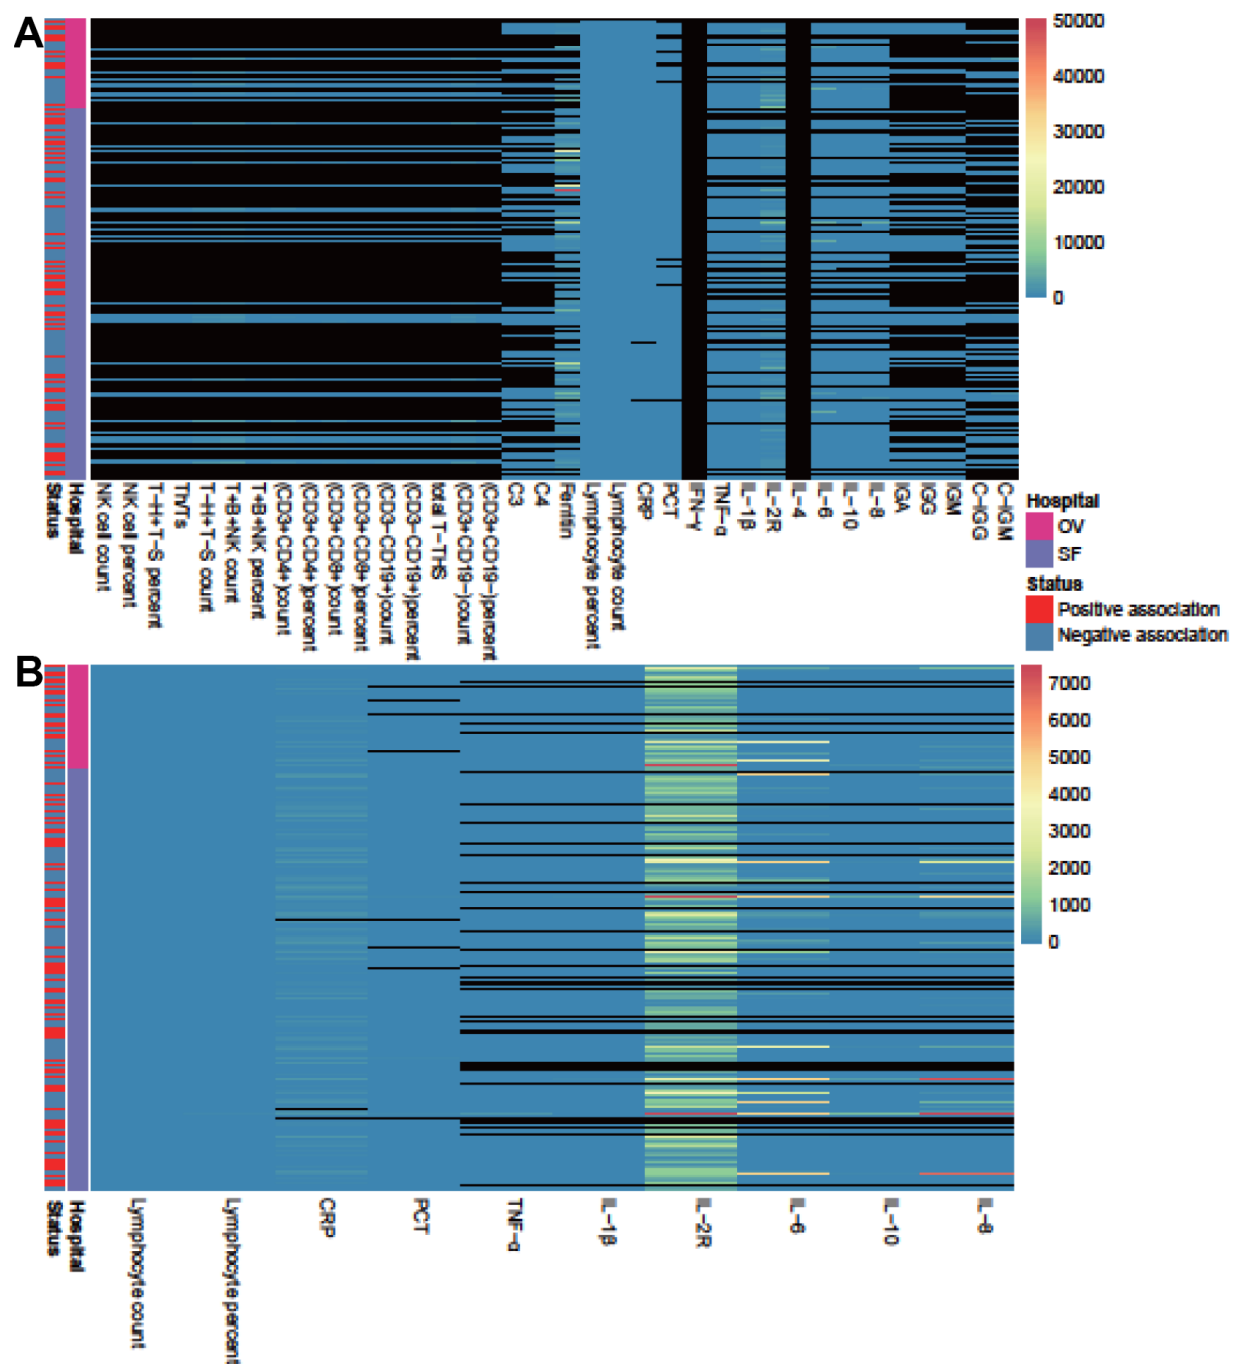

**Supplementary Figure 1. Visualization of the denoising and filtering process.** (A) Heatmap of raw lab test data. (B) Heatmap of lab test data after removing lab test features with more than and equal to 20% missing entries across the SF and OV hospitals. Black tiles refer to missing entries. Abbreviations: NK, natural killer; Th, T-helper lymphocyte; Ts, T-suppressor lymphocyte; C3, complement 3; C4, complement 4; CRP, C reactive protein; PCT, procalcitonin; IFN- $\gamma$ , interferon- $\gamma$ ; TNF- $\alpha$ , tumor necrosis factor  $\alpha$ ; IL-1 $\beta$ , interleukin-1 $\beta$ ; IL-2R, interleukin-2 receptor; IL-4, interleukin-4; IL-6, interleukin-6; IL-8, interleukin-8; IL-10, interleukin-10; IGA, immunoglobulin A; IGG, immunoglobulin G; IGM, immunoglobulin M; C-IGG SARS-CoV-2 specific antibody IgG; C-IGM SARS-CoV-2 specific antibody IgM; SF, Sino-French New City Campus of Tongji Hospital; OV, Optical Valley Campus of Tongji Hospital.

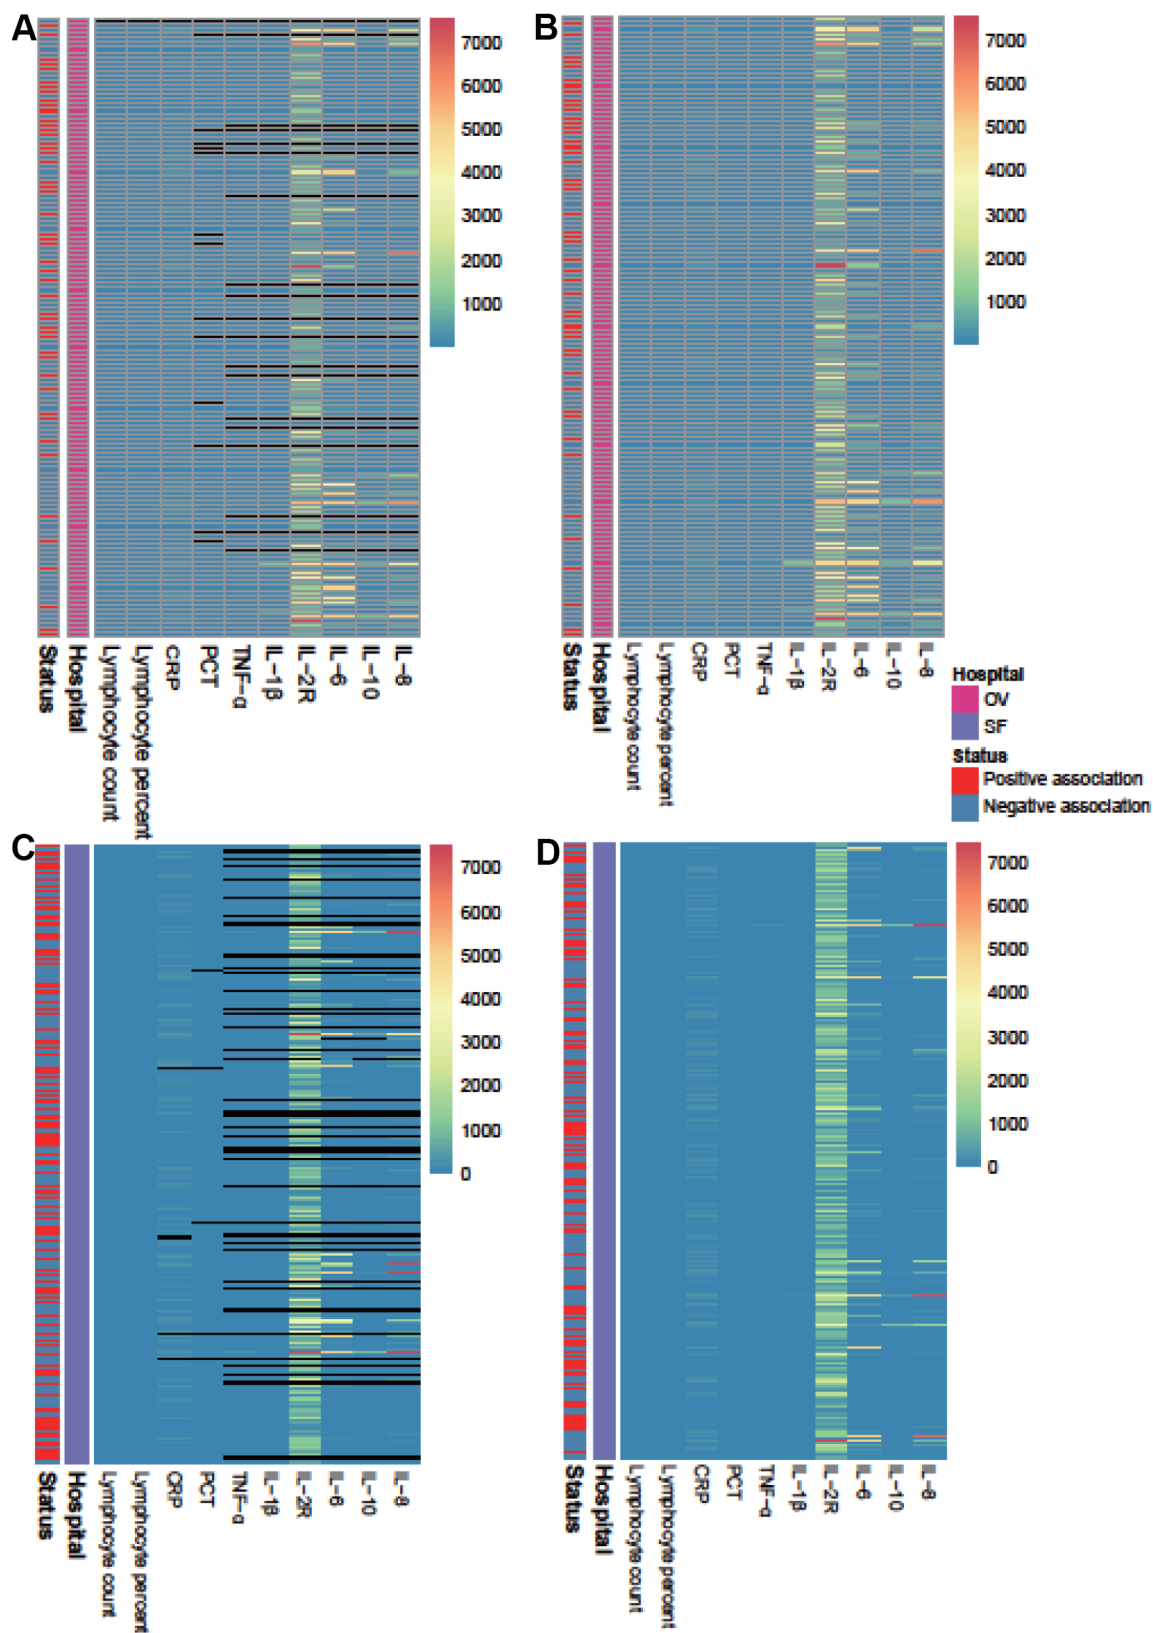

**Supplementary Figure 2. Visualization of the imputation process.** (A, C) Heatmap of SF and OV lab test data before imputation. (B, D) Heatmap of SF and OV lab test data after imputation. Black tiles refer to missing entries. Abbreviations: CRP, C reactive protein; PCT, procalcitonin; TNF- $\alpha$ , tumor necrosis factor  $\alpha$ ; IL-1 $\beta$ , interleukin-1 $\beta$ ; IL-2R, interleukin-2 receptor; IL-6, interleukin-6; IL-8, interleukin-8; IL-10, interleukin-10; SF, Sino-French New City Campus of Tongji Hospital; OV, Optical Valley Campus of Tongji Hospital.

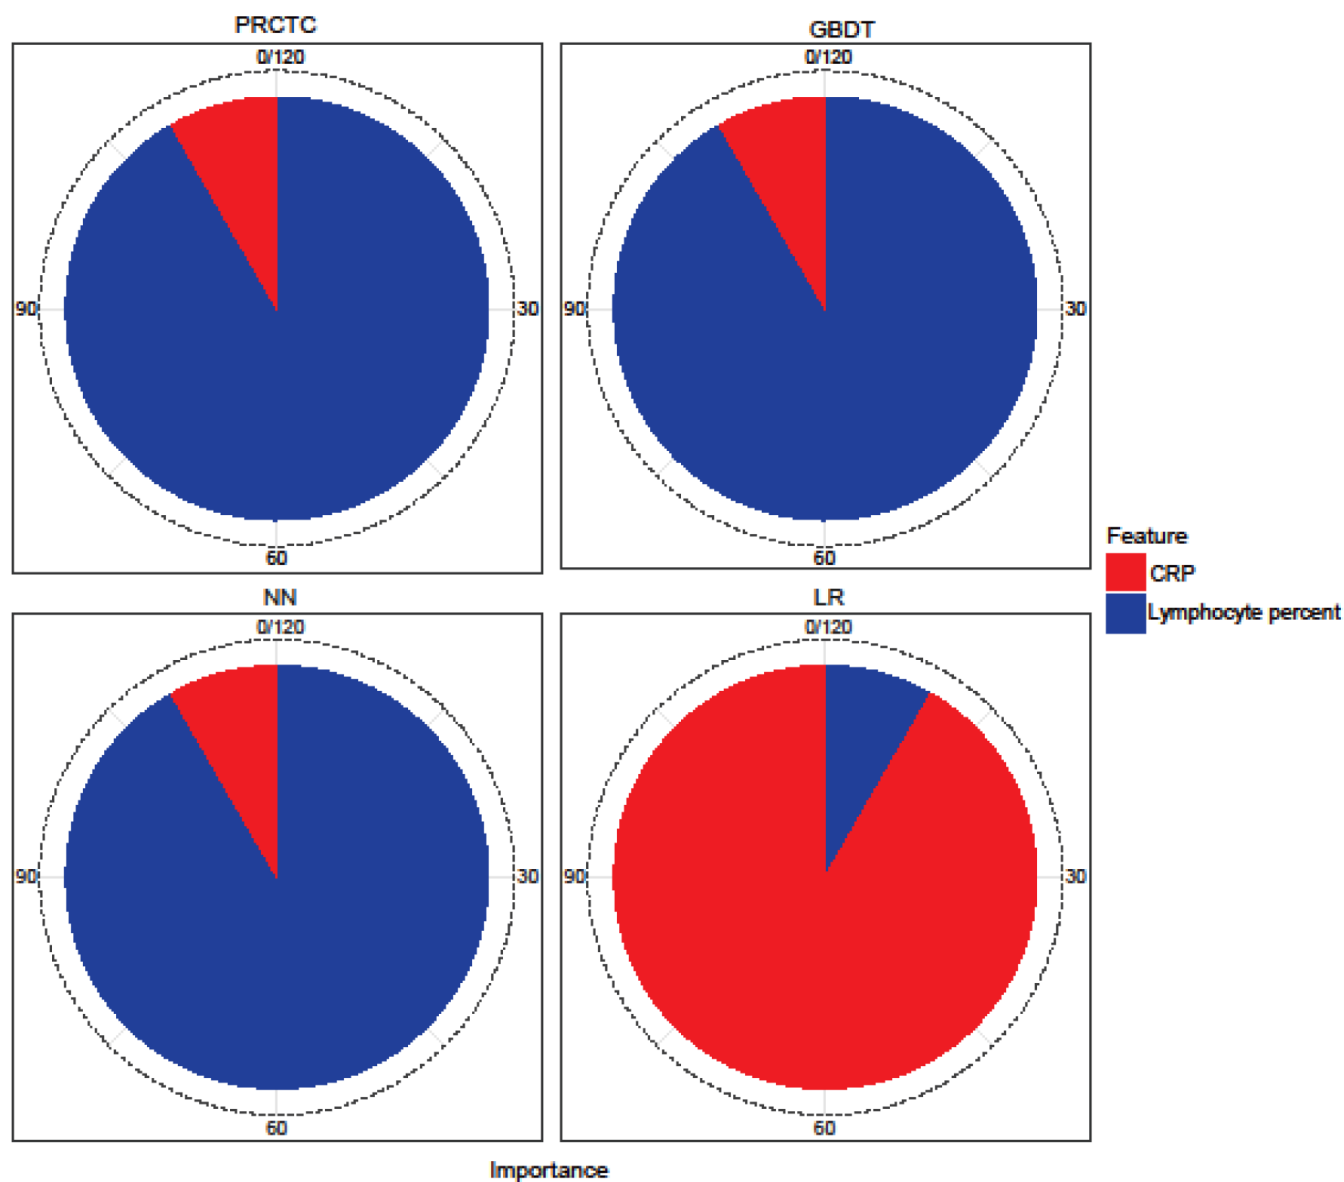

**Supplementary Figure 3. The importance of relative features derived from PRCTC, GBDT, NN, and LR model, respectively.** Abbreviations: PRCTC, prediction of response to corticosteroid therapy in COVID-19 patients; LR, logistic regression; GBDT, gradient boosted decision tree; NN, neural network.
